# Supplementary material
Source: PubMed Central journal article supplement (PMC4545373)
Supplement: Supp_Fig1.pdf [file Supp_Fig1.pdf]

## Supplementary Data

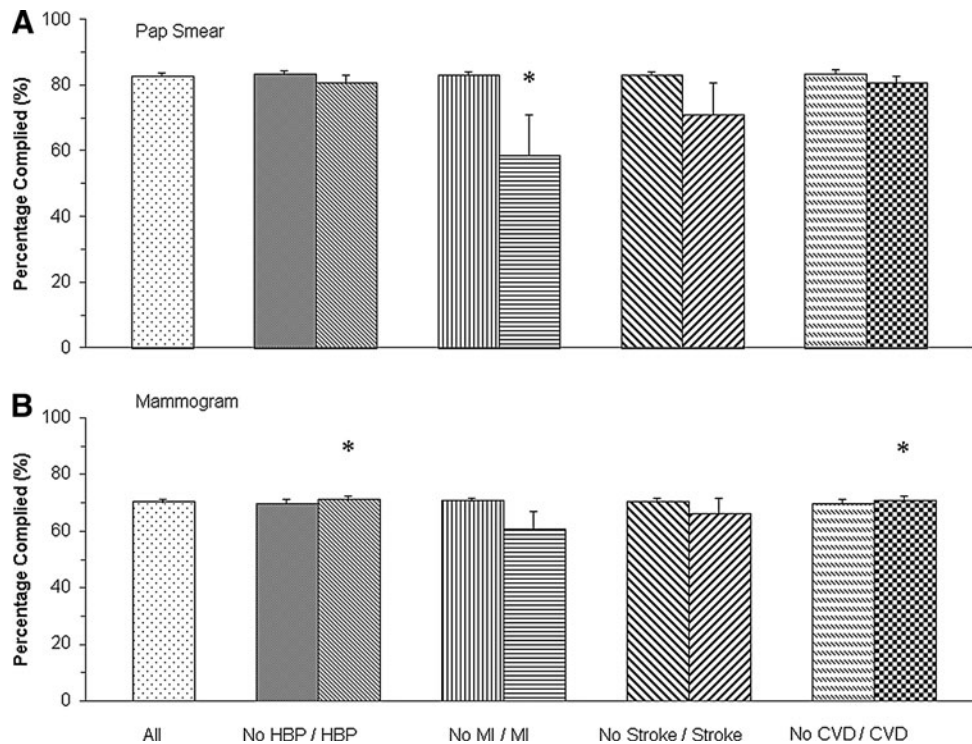

**SUPPLEMENTARY FIG. S1.** Compliance with Papanicolaou (Pap) smear and mammogram recommendations by CVD status in United States adult women, National Health Interview Survey (NHIS) 2013, sensitivity analysis. Sensitivity analyses were conducted on women aged 24–65 years for pap smear and women aged 42 years older for mammogram. **(A)** Compliance with Pap smear recommendations. **(B)** Compliance with mammogram recommendations. Data are presented as proportion of women complied with cervical and breast cancer screening guidelines. Error bar is 95% confidence interval. Proportion was weighted using sample weights. \*Statistical significance for the comparison between people with/without disease, after adjusted for age group, race, immigration status, region of residence, marital status, education level, family income to poverty threshold ratio, health insurance coverage, usual place of care, and visiting an OB/GYN in the past year. CVD, any type of cardiovascular diseases; HBP, high blood pressure; MI, myocardial infarction.
