# Supplementary material
Source: PubMed Central journal article supplement (PMC4545373)
Supplement: Supp_Table1.pdf [file Supp_Table1.pdf]

SUPPLEMENTARY TABLE S1. MULTIVARIATE LOGISTIC MODELS FOR COMPLIANCE WITH SCREENING RECOMMENDATIONS IN U.S. ADULT WOMEN BY CARDIOVASCULAR DISEASE STATUS

| <i>Disease/condition</i> | <i>Odds ratio (95% confidence interval) of disease vs. without disease</i> |                            |                            |                            |
|--------------------------|----------------------------------------------------------------------------|----------------------------|----------------------------|----------------------------|
|                          | <i>Pap smear</i>                                                           |                            | <i>Mammogram</i>           |                            |
|                          | <i>Model 1<sup>a</sup></i>                                                 | <i>Model 2<sup>b</sup></i> | <i>Model 1<sup>a</sup></i> | <i>Model 2<sup>b</sup></i> |
| Hypertension             | 1.08 (0.91–1.29)                                                           | 0.97 (0.81–1.16)           | 1.24 (1.10–1.40)           | 1.18 (1.05–1.33)           |
| Myocardial infarction    | 0.37 (0.22–0.64)                                                           | 0.27 (0.16–0.47)           | 0.99 (0.72–1.36)           | 0.96 (0.71–1.29)           |
| Stroke                   | 0.68 (0.42–1.10)                                                           | 0.62 (0.38–1.04)           | 1.28 (0.97–1.69)           | 1.12 (0.84–1.50)           |

Data Source: Disease Control and Prevention, National Center for Health Statistics (CDC/NCHS), National Health Interview Survey, 2013.

For the analyses on individual cardiovascular disease (CVD) type, women with other types of CVD were excluded from the comparison group.

<sup>a</sup>Variables in Model 1 included disease status, age group, race, immigration status, region of residence, marital status, education level, and family income to poverty threshold ratio.

<sup>b</sup>Variables in Model 2 further included variables from Model 1 and health insurance coverage, usual place of care, and visiting an obstetrician/gynecologist in the past year.
