# Supplementary material
Source: PubMed Central journal article supplement (PMC4545373)
Supplement: Supp_Table2.pdf [file Supp_Table2.pdf]

SUPPLEMENTARY TABLE S2. MULTIVARIATE LOGISTIC MODELS FOR COMPLIANCE WITH SCREENING RECOMMENDATIONS IN U.S. ADULT WOMEN BY CVD STATUS: SENSITIVITY ANALYSIS

| <i>Disease/condition</i> | <i>Odds ratio (95% CI) of disease vs. without disease</i> |                            |                            |                            |
|--------------------------|-----------------------------------------------------------|----------------------------|----------------------------|----------------------------|
|                          | <i>Pap smear</i>                                          |                            | <i>Mammogram</i>           |                            |
|                          | <i>Model 1<sup>a</sup></i>                                | <i>Model 2<sup>b</sup></i> | <i>Model 1<sup>a</sup></i> | <i>Model 2<sup>b</sup></i> |
| Hypertension             | 1.09 (0.92–1.30)                                          | 1.00 (0.83–1.19)           | 1.26 (1.11–1.41)           | 1.20 (1.06–1.36)           |
| Myocardial infarction    | 0.39 (0.23–0.66)                                          | 0.29 (0.17–0.51)           | 0.85 (0.62–1.16)           | 0.89 (0.66–1.19)           |
| Stroke                   | 0.72 (0.45–1.15)                                          | 0.69 (0.42–1.14)           | 1.08 (0.83–1.41)           | 1.03 (0.78–1.36)           |
| Any type of CVD          | 1.02 (0.88–1.20)                                          | 0.92 (0.78–1.09)           | 1.25 (1.11–1.40)           | 1.19 (1.06–1.34)           |

Data source: CDC/NCHS, National Health Interview Survey, 2013.

Sensitivity analyses were conducted on women aged 24–65 years for Pap smear and women aged 42 years older for mammogram.

<sup>a</sup>Variables in Model 1 included disease status, age group, race, immigration status, region of residence, marital status, education level, and family income to poverty threshold ratio.

<sup>b</sup>Variables in Model 2 further included variables from Model 1 and health insurance coverage, usual place of care, and visiting an obstetrician/gynecologist in the past year.
